# Supplementary material
Source: Springer Nature journal article supplement (https://www.springermedizin.de/resource/supplementary/13054_2011_9911_MOESM7_ESM.pdf/9708506)

**A**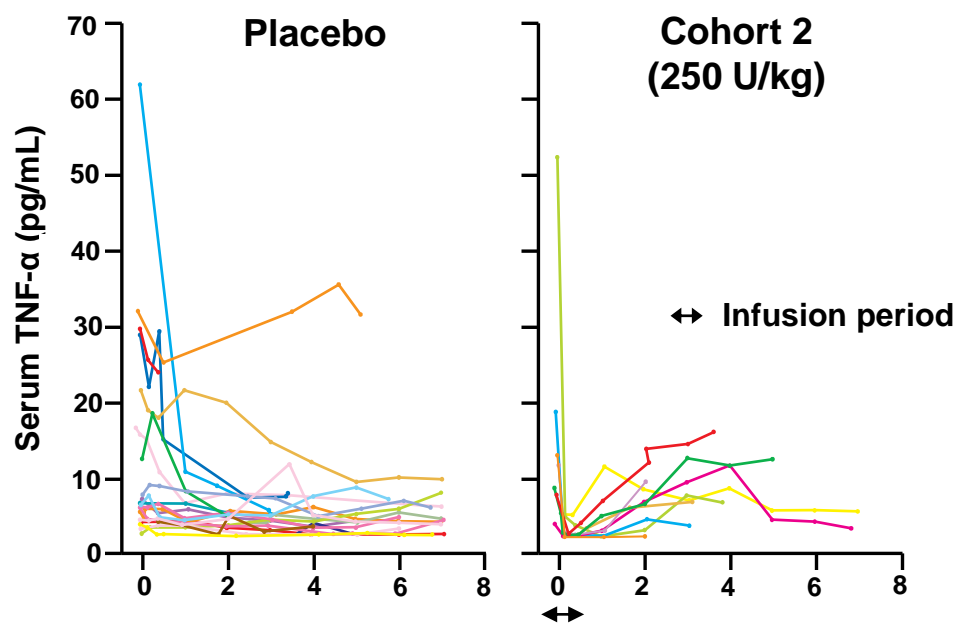**B**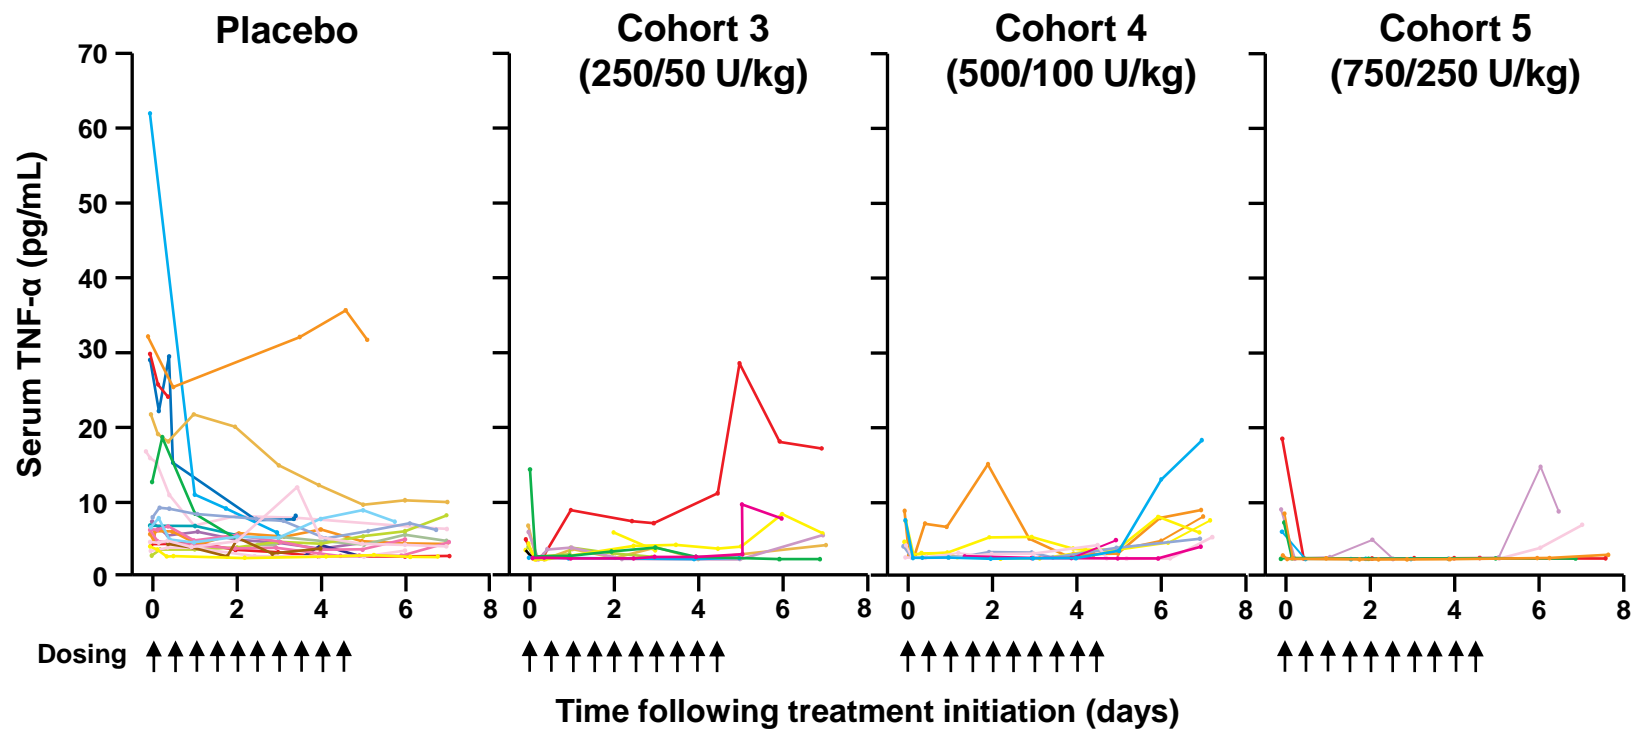

Supplement: MOESM7 [file 9708506]
